# Supplementary material
Source: Elsevier journal article supplement (https://www.sciencedirect.com/science/article/pii/S1885585717305133)

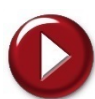

## Supplementary material

### Determinants and Prognostic Impact of Heart Failure and Left Ventricular Ejection Fraction in Acute Coronary Syndrome Settings

**Figure of the supplementary material.** Kaplan-Meier curves for time free of all-cause mortality according to LVEF categories during the first year of follow-up in the entire cohort (A), patients without HF (B) and patients with HF (C) during hospitalization. ACS, acute coronary syndrome; HF, heart failure; LVEF, left ventricular ejection fraction.

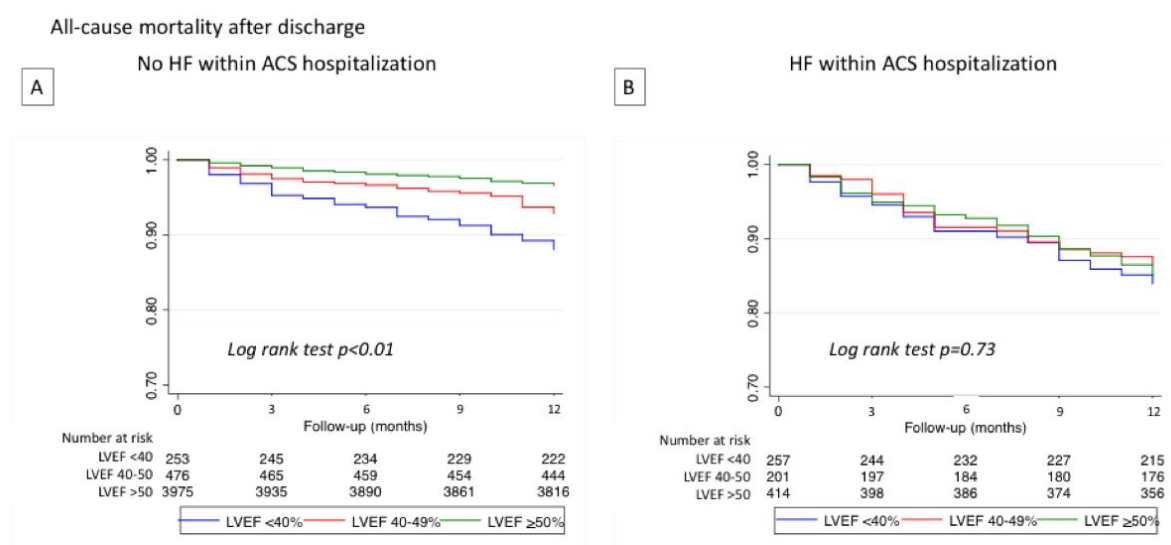

Supplement: mmc1 [file S1885585717305133:mmc1.pdf]
